# Supplementary material for: Glucose-Limited Fed-Batch Cultivation Strategy to Mimic Large-Scale Effects in Escherichia coli Linked to Accumulation of Non-Canonical Branched-Chain Amino Acids by Combination of Pyruvate Pulses and Dissolved Oxygen Limitation
Source: MDPI journal article supplement (doi:10.3390/microorganisms9061110), 2021-05-21
Supplement: s1 [file s1]

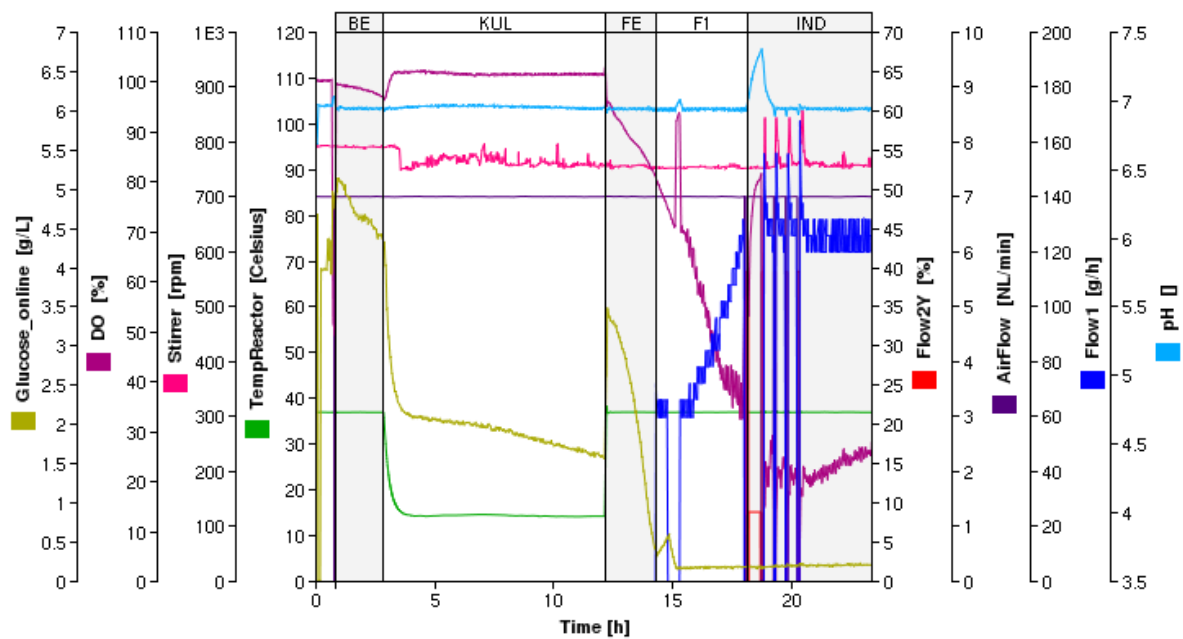

(a)

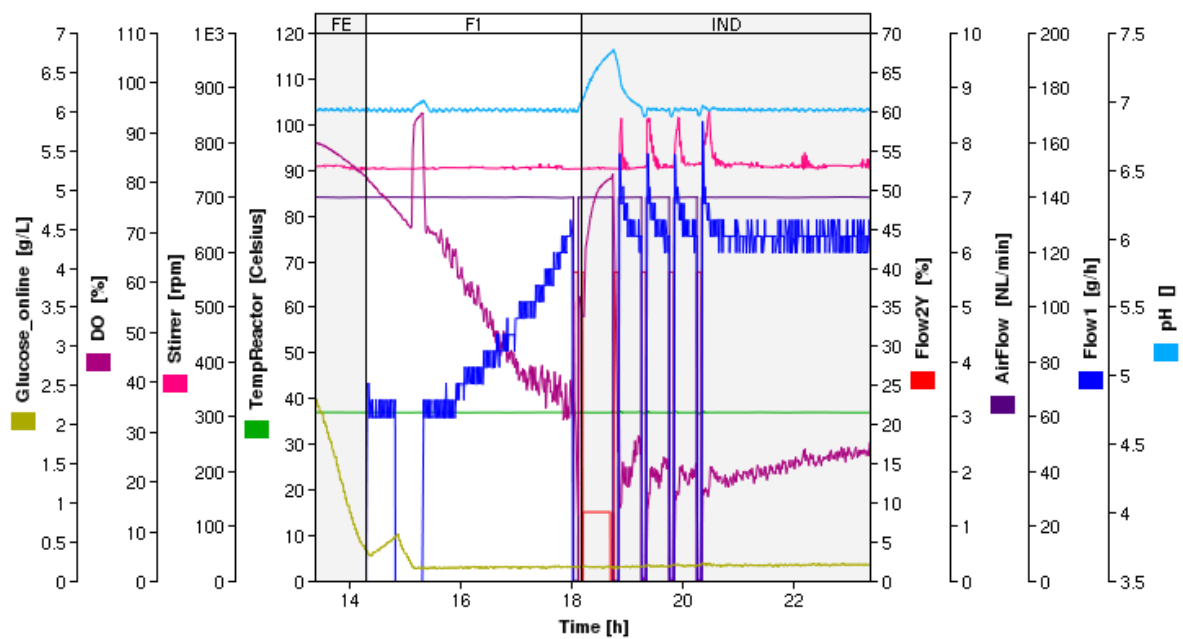

(b)

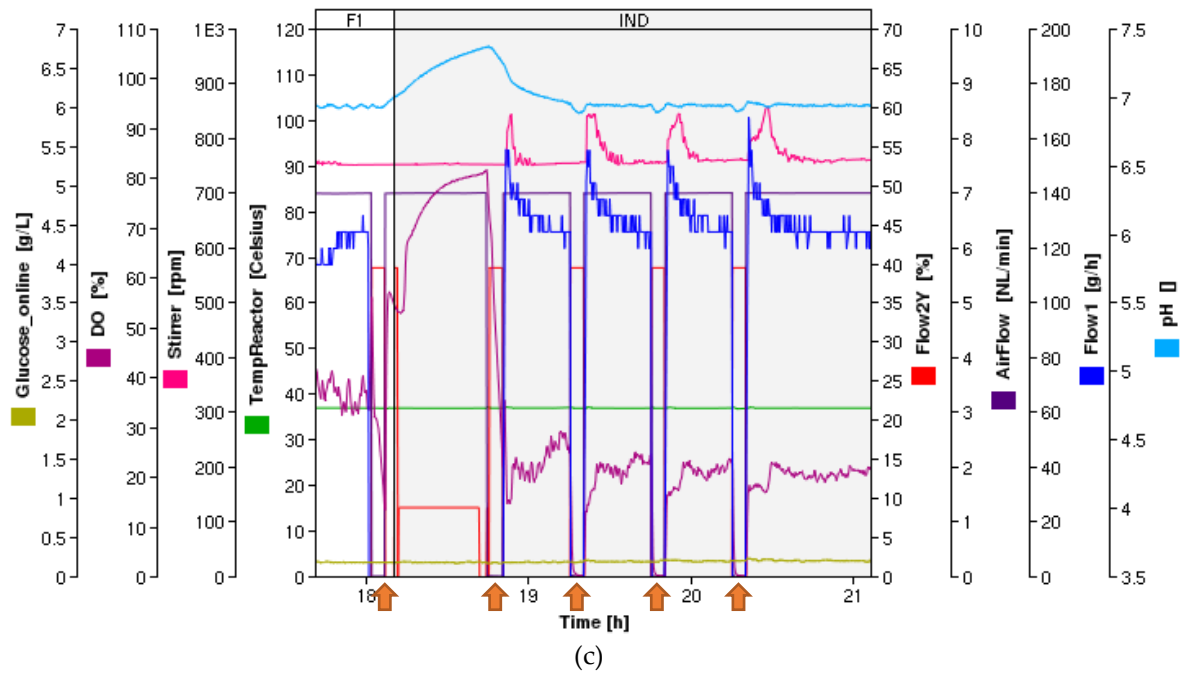

**Figure S3.** Overview of the cultivation of *E. coli* K-12 BW25113 pSW3\_ *lacI*<sup>+</sup> exposed to pyruvate pulses and DO limitation in a 15L reactor, during the whole cultivation process (a), during fed-batch period (b) and during pyruvate pulsing (c). Different cultivation phases are shown in the diagram as *BE* (first 2h of batch phase), *KUL* (10h cold period at 15 °C), *FE* (remaining 2h of batch phase), *F1* (3h exponential fed-batch phase) and *IND* (induction, linear fed-batch phase and pyruvate pulsing). IPTG induction was performed during 30 minutes (18.25 to 18.75 h cultivation time). Pyruvate pulses are indicated by orange arrows (c). Present in the diagram axes, *Flow1* corresponds to the flow rate (g/h) of the pump transporting the feed solution into the reactor while *Flow2Y* corresponds to one tenth of the flow rate (g/h) of the pump transporting either the IPTG solution used for induction or the pyruvate solution employed for pulsing. Unexpectedly, exponential fed-batch started shortly before glucose was completely consumed in the batch phase. Hence, a small glucose accumulation was reported at around 15h. In order to correct this, exponential feeding was shortly shut down until glucose was completely depleted and then, activated again.
