# Supplementary figures and images for: Glucose-Limited Fed-Batch Cultivation Strategy to Mimic Large-Scale Effects in Escherichia coli Linked to Accumulation of Non-Canonical Branched-Chain Amino Acids by Combination of Pyruvate Pulses and Dissolved Oxygen Limitation
Source: MDPI journal article supplement (doi:10.3390/microorganisms9061110), 2021-05-21

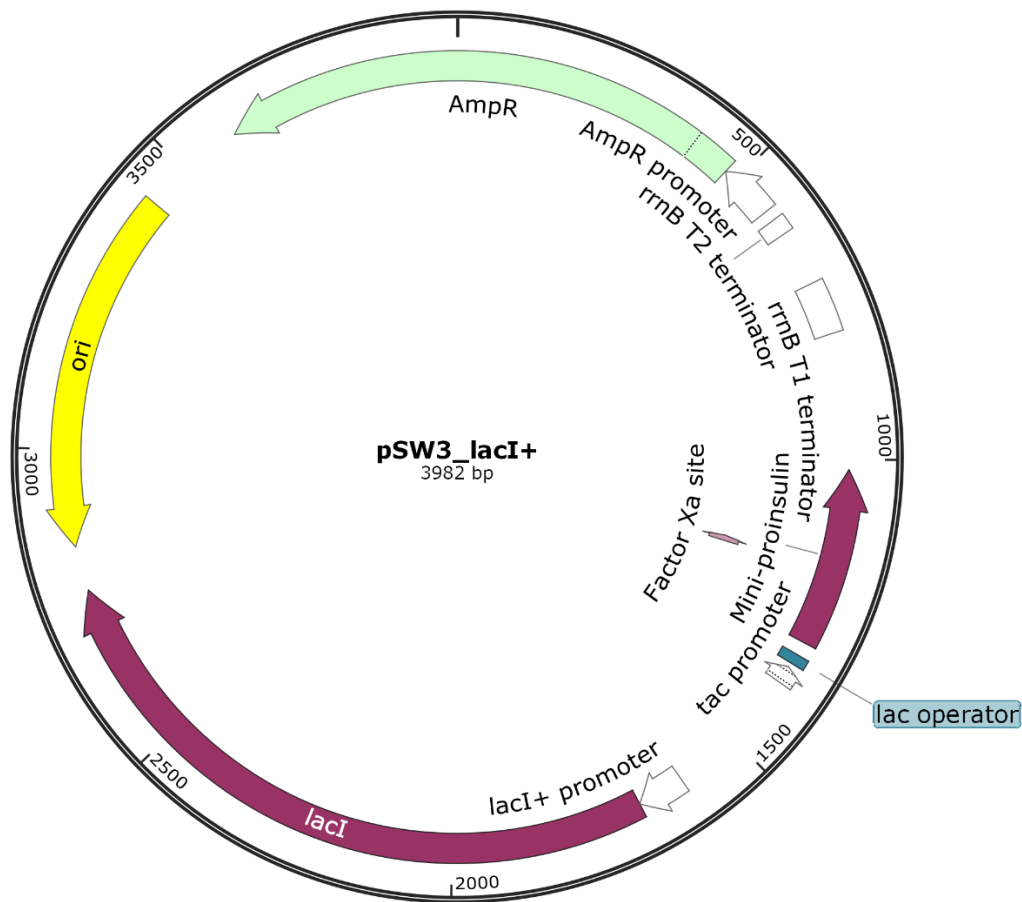

**Figure S1.** Genetic map of plasmid pSW3\_lacI<sup>+</sup>. Plasmid map was generated by Snapgene®.

Supplement: s1 [file s1]
